# Supplementary material
Source: ML conference proceedings conference paper supplement (https://proceedings.neurips.cc/paper_files/paper/2022/hash/1377f76686d56439a2bd7a91859972f5-Abstract.html)
Supplement: Supplementary file 1 [file 1377f76686d56439a2bd7a91859972f5-Supplemental-Conference.zip]

Archive with 2 entries (2 files):
- appendix.pdf
- code.txt
