# Supplementary material
Source: ML conference proceedings conference paper supplement (https://proceedings.neurips.cc/paper_files/paper/2022/hash/1377f76686d56439a2bd7a91859972f5-Abstract.html)
Supplement: Supplementary file 1 [file 1377f76686d56439a2bd7a91859972f5-Supplemental-Conference.zip › code.txt]

github: https://github.com/RyanWangZf/transtab

doc: https://transtab.readthedocs.io/en/latest/
